# Supplementary material
Source: PubMed Central journal article supplement (PMC1316119)

**Supplementary Figure 1.** Comparison of old and new oligonucleotide array CGH protocols. Genome-wide profiles are shown that were obtained from hybridisation of BT474 DNA with human male reference DNA. A shows the data as previously published using the old protocol on a 19K human oligonucleotide array (6). B shows the data obtained with the optimised protocol on a 29K human oligonucleotide array and is the same as shown in Figure 1A allowing easy comparison of both protocols. Log<sub>2</sub>ratios were calculated with a weighted moving average as described(11) using a window of 250 kb and are displayed as a function of their position in the genome. Log<sub>2</sub>ratios of the odd and even chromosomes are shown in aqua blue and black, respectively. Chromosome numbers are indicated. Smoothed values of the log<sub>2</sub>ratios were calculated using a dedicated smoothing algorithm(14) (red).

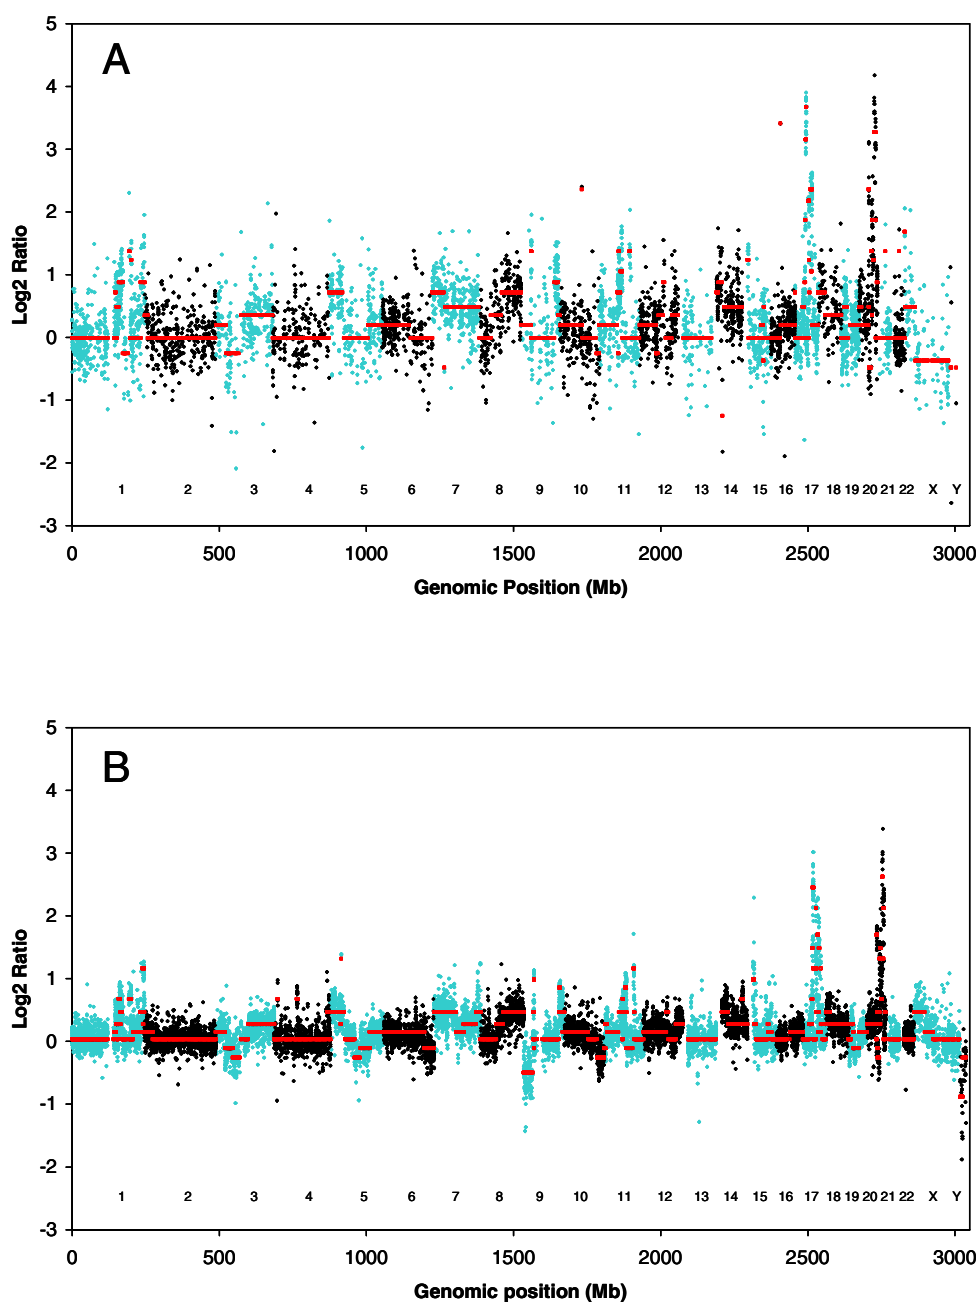

Supplement: nar_33_22_e192__1.pdf [file nar_33_22_e192__1.pdf]
