# Supplementary material
Source: PubMed Central journal article supplement (PMC1316119)

**Supplementary Figure 2.** Effect of Cot1 DNA concentration. Genome-wide profiles are shown that were obtained from hybridisation of BT474 DNA with human male reference DNA in the presence of 0 (A), 10  $\mu\text{g}$  (B) or 100  $\mu\text{g}$  (C) Cot1 DNA. Hybridisations were performed using the same pool of labeled DNA, the same batch of 29K oligonucleotide arrays and on the same day. Log<sub>2</sub>ratios were calculated with a weighted moving average as described(11) using a window of 250 kb and are displayed as a function of their position in the genome. Log<sub>2</sub>ratios of the odd and even chromosomes are shown in aqua blue and black, respectively. Chromosome numbers are indicated. Smoothed values of the log<sub>2</sub>ratios were calculated using a dedicated smoothing algorithm(14) (red).

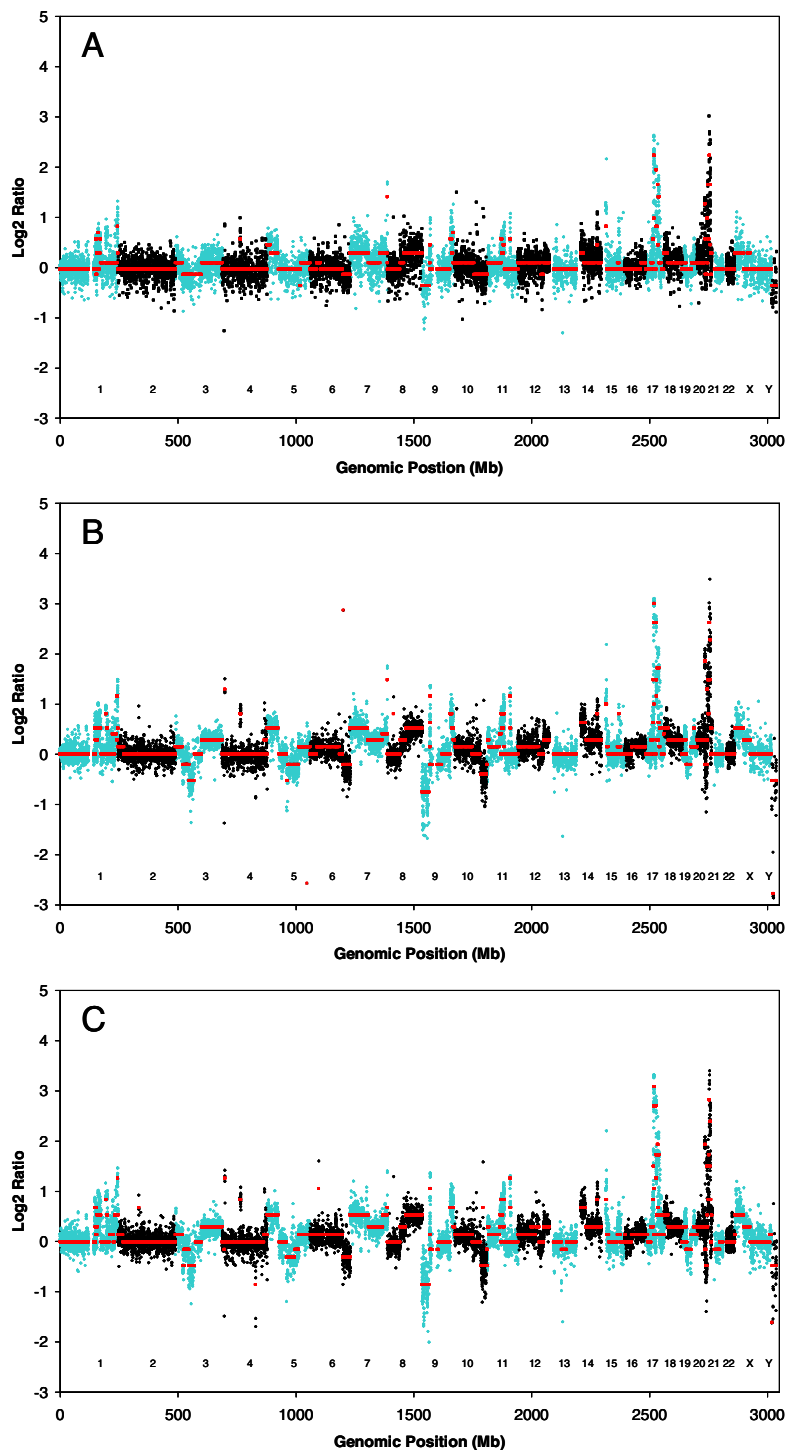

Supplement: nar_33_22_e192__2.pdf [file nar_33_22_e192__2.pdf]
