# Supplementary material
Source: PubMed Central journal article supplement (PMC1316119)
Supplement: nar_33_22_e192__4.pdf [file nar_33_22_e192__4.pdf]

**Supplementary Table 1.** Reproducibility. Overview of all array experiments described in the paper providing standard deviations and relative numbers of usable features, indicating the reproducibility of noise and quality of the oligonucleotide array CGH platform. *Test sample*: name of the sample used in the test channel, *Ref. sample*: indicating the DNA used in the reference channel, *Tissue*: indicating the tissue type of the sample, *Type*: indicating whether the DNA was isolated from fresh or frozen tissue or from a formalin fixed paraffin embedded (FFPE) archival source, *Batch*: arbitrary batch number indicating whether arrays are from the same or different print batches, *Array elements*: indicating the number, species and type (BACs or oligonucleotides) of array elements used, *Remarks*: indicating conditions different from the described methods, *St. deviation*: the standard deviation of the log<sub>2</sub>ratio's in an area without chromosomal aberrations as determined by the smoothing algorithm(14), *Area for Stdev*: chromosomal area used to calculate the standard deviation, *% Features*: relative number of features that passed quality control, *Figure nr*: indicating the Figure numbers in which data from this experiment are displayed, *GEO acc. nr.*: indicating the accession number in the Gene Expression Omnibus database ([www.ncbi.nlm.nih.gov/projects/geo](http://www.ncbi.nlm.nih.gov/projects/geo)) from which experimental data are available.

Supplementary Table 1

| Nr. | Test sample      | Ref. sample   | Tissue    | Type   | Batch | Array elements  | Remarks                           | St. deviation | Area for Stdev       | % Features | Figure nr.     | GEO acc. nr. |
|-----|------------------|---------------|-----------|--------|-------|-----------------|-----------------------------------|---------------|----------------------|------------|----------------|--------------|
| 1   | BT474            | normal male   | cell line | fresh  | A     | 29K human oligo |                                   | 0.25          | chr. 2               | 94.6       | 1A, 1C, 3, S1B | GSM73557     |
| 2   | BT474            | normal male   | cell line | fresh  | B     | 29K human oligo |                                   | 0.24          | chr. 2               | 86.3       | 3              | GSM75164     |
| 3   | BT474            | normal male   | cell line | fresh  | C     | 29K human oligo |                                   | 0.25          | chr. 2               | 88.6       | 3              | GSM75165     |
| 4   | BT474            | normal male   | cell line | fresh  | B     | 29K human oligo | 1 µg input DNA                    | 0.24          | chr. 2               | 90.7       | 3              | GSM75166     |
| 5   | BT474            | normal male   | cell line | fresh  | A     | 29K human oligo | no Cot1 DNA                       | 0.28          | chr. 2               | 87.4       |                | GSM75167     |
| *6  | BT474            | normal male   | cell line | fresh  | D     | 19K human oligo | 100 µg Cot1 DNA                   | 0.45          | chr. 2               | 34.9       | S1A            | GSM82460     |
| 7   | BT474            | normal male   | cell line | fresh  | E     | 29K human oligo | no Cot1 DNA                       | 0.29          | chr. 2               | 76.2       | S2A            | GSM82461     |
| 8   | BT474            | normal male   | cell line | fresh  | E     | 29K human oligo |                                   | 0.23          | chr. 2               | 83.6       | S2B            | GSM82462     |
| 9   | BT474            | normal male   | cell line | fresh  | E     | 29K human oligo | 100 µg Cot1 DNA                   | 0.25          | chr. 2               | 89.2       | S2C            | GSM82463     |
| 10  | normal female 23 | normal male   | blood     | fresh  | F     | 29K human oligo |                                   | 0.16          | chr. 1-22            | 93.2       | 1B, 1D         | GSM75163     |
| 11  | normal female 24 | normal male   | blood     | fresh  | F     | 29K human oligo |                                   | 0.24          | chr. 1-22            | 92.3       |                | GSM75867     |
| 12  | normal female 26 | normal male   | blood     | fresh  | F     | 29K human oligo |                                   | 0.22          | chr. 1-22            | 94.7       |                | GSM75868     |
| 13  | normal female 37 | normal male   | blood     | fresh  | F     | 29K human oligo |                                   | 0.20          | chr. 1-22            | 95.3       |                | GSM75869     |
| 14  | normal female 45 | normal male   | blood     | fresh  | F     | 29K human oligo |                                   | 0.19          | chr. 1-22            | 95.0       |                | GSM75870     |
| 15  | normal female 46 | normal male   | blood     | fresh  | G     | 29K human oligo |                                   | 0.21          | chr. 1-22            | 87.2       |                | GSM75871     |
| 16  | normal female 51 | normal male   | blood     | fresh  | G     | 29K human oligo |                                   | 0.22          | chr. 1-22            | 80.0       |                | GSM75872     |
| 17  | normal female 63 | normal male   | blood     | fresh  | G     | 29K human oligo |                                   | 0.20          | chr. 1-22            | 83.8       |                | GSM75873     |
| 18  | GM01750          | normal female | cell line | fresh  | A     | 29K human oligo |                                   | 0.21          | chr. 2               | 92.0       | 2              | GSM74521     |
| 19  | GM07408          | normal male   | cell line | fresh  | A     | 29K human oligo |                                   | 0.28          | chr. 2               | 94.9       |                | GSM75168     |
| 20  | GM13031          | normal female | cell line | fresh  | A     | 29K human oligo |                                   | 0.19          | chr. 2               | 93.2       |                | GSM74522     |
| 21  | MDA468           | normal male   | cell line | fresh  | F     | 29K human oligo |                                   | 0.20          | chr. 2 (50 Mb - end) | 96.0       | 4A             | GSM75169     |
| 22  | SUM159           | normal male   | cell line | fresh  | G     | 29K human oligo |                                   | 0.23          | chr. 2 (15 Mb - end) | 93.1       | 4C             | GSM75170     |
| 23  | SKBR7            | normal male   | cell line | fresh  | H     | 29K human oligo |                                   | 0.21          | chr. 2               | 92.8       | 5A             | GSM75171     |
| 24  | Gastric A        | normal female | tumour    | FFPE   | I     | 29K human oligo |                                   | 0.37          | chr. 2 (part)        | 88.1       | 6A             | GSM75199     |
| 25  | Gastric A        | normal female | tumour    | FFPE   | J     | 5K human BAC    | 100 µg Cot1 DNA                   | 0.14          | chr. 2 (part)        | 80.5       | 6B             | GSM75205     |
| 26  | Gastric A        | normal female | tumour    | FFPE   | B     | 29K human oligo |                                   | 0.34          | chr. 2 (part)        | 82.6       |                | GSM75201     |
| 27  | Gastric A        | normal female | tumour    | FFPE   | B     | 29K human oligo |                                   | 0.26          | chr. 2 (part)        | 93.5       |                | GSM75203     |
| 28  | Gastric A        | normal female | tumour    | FFPE   | K     | 5K human BAC    | 100 µg Cot1 DNA                   | 0.21          | chr. 2 (part)        | 84.7       |                | GSM75208     |
| 29  | lung A           | normal female | tumour    | frozen | I     | 29K human oligo | 1 µg input DNA                    | 0.19          | chr. 2               | 94.8       | S3A            | GSM82464     |
| 30  | lung A           | normal female | tumour    | frozen | L     | 29K human oligo | 1 µg input DNA                    | 0.24          | chr. 2               | 98.8       | S3B            | GSM82465     |
| 31  | mouse 137        | spleen        | tumour    | frozen | M     | 21K mouse oligo |                                   | 0.32          | chr. 9               | 74.9       | 7A             | GSM75209     |
| 32  | mouse 137        | spleen        | tumour    | frozen | N     | 3K mouse BAC    | 32 and 33 are techn. replicates   | 0.08          | chr. 9               |            | 7B             | GSM75175     |
| 33  | mouse 137        | spleen        | tumour    | frozen | N     | 3K mouse BAC    |                                   |               |                      |            |                |              |
| 34  | mouse 32         | spleen        | tumour    | frozen | M     | 21K mouse oligo |                                   | 0.363         | chr. 7 (part)        | 67.4       |                | GSM75211     |
| 35  | mouse 32         | spleen        | tumour    | frozen | N     | 3K mouse BAC    | 35 and 36 are dye-swap replicates | 0.105         | chr. 7 (part)        |            |                | GSM75172     |
| 36  | mouse 32         | spleen        | tumour    | frozen | N     | 3K mouse BAC    |                                   |               |                      |            |                |              |

\* this experiment was published in Carvalho et al (2004) *J.Clin.Path.*, **57**, 644-646 (6).
